# Supplementary material for: Risk Polymorphisms of FNDC5, BDNF, and NTRK2 and Poor Education Interact and Aggravate Age-Related Cognitive Decline
Source: MDPI journal article supplement (doi:10.3390/ijms242417210), 2023-12-07
Supplement: s1 [file s1]

# Risk Polymorphisms of *FNDC5*, *BDNF*, and *NTRK2* and Poor Education Interact and Aggravate Age-Related Cognitive Decline

Alessandra Mendonça Tomás <sup>1,2</sup>, Natáli Valim Oliver Bento-Torres <sup>1,3,\*</sup>, Naina Yuki Vieira Jardim <sup>1,4</sup>, Patrícia Martins Moraes <sup>1,3</sup>, Victor Oliveira da Costa <sup>1,4</sup>, Antônio Conde Modesto <sup>5</sup>, André Salim Khayat <sup>5</sup>, João Bento-Torres <sup>1,3</sup> and Cristovam Wanderley Picanço-Diniz <sup>1,4,5</sup>

**Supplementary Table S1.** Significant CANTAB results in three-way ANOVA. Values are shown as mean Z score  $\pm$  SD.

| Tests                                | Education | Age   | SNP NTRK2 (n) | Mean $\pm$ SD                      | CI 95%                 | d           |
|--------------------------------------|-----------|-------|---------------|------------------------------------|------------------------|-------------|
| PAL total errors adjusted (score)    | Lower     | Young | AA+AG (25)    | -0.73 $\pm$ 0.40                   | -0.23, 0.44            | 0.32        |
|                                      |           |       | GG (31)       | -0.83 $\pm$ 0.22                   |                        |             |
|                                      |           | Older | AA+AG (16)    | 1.01 $\pm$ 1.14                    | -0.64, 0.18            | 0.23        |
|                                      |           |       | GG (21)       | 1.24 $\pm$ 0.92                    |                        |             |
|                                      | Higher    | Young | AA+AG (20)    | -0.86 $\pm$ 0.27                   | -0.34, 0.37            | 0.05        |
|                                      |           |       | GG (31)       | -0.87 $\pm$ 0.18                   |                        |             |
|                                      |           | Older | AA+AG (28)    | <b>0.86 <math>\pm</math> 0.97</b>  | <b>0.59, 1.27***</b>   | <b>1.19</b> |
|                                      |           |       | GG (27)       | <b>-0.07 <math>\pm</math> 0.52</b> |                        |             |
| PAL mean trials to success (score)   | Lower     | Young | AA+AG (25)    | -0.83 $\pm$ 0.32                   | -0.26, 0.35            | 0.16        |
|                                      |           |       | GG (31)       | -0.88 $\pm$ 0.29                   |                        |             |
|                                      |           | Older | AA+AG (16)    | <b>0.87 <math>\pm</math> 0.94</b>  | <b>-0.88, -0.12**</b>  | <b>0.58</b> |
|                                      |           |       | GG (21)       | <b>1.38 <math>\pm</math> 0.83</b>  |                        |             |
|                                      | Higher    | Young | AA+AG (20)    | -0.94 $\pm$ 0.40                   | -0.32, 0.33            | 0.03        |
|                                      |           |       | GG (31)       | -0.95 $\pm$ 0.22                   |                        |             |
|                                      |           | Older | AA+AG (28)    | <b>0.83 <math>\pm</math> 0.77</b>  | <b>0.45, 1.07***</b>   | <b>1.07</b> |
|                                      |           |       | GG (27)       | <b>0.06 <math>\pm</math> 0.67</b>  |                        |             |
| PAL first trial memory score (score) | Lower     | Young | AA+AG (25)    | 0.74 $\pm$ 0.72                    | -0.46, 0.28            | 0.12        |
|                                      |           |       | GG (31)       | 0.83 $\pm$ 0.77                    |                        |             |
|                                      |           | Older | AA+AG (16)    | -1.02 $\pm$ 0.80                   | -0.57, 0.34            | 0.16        |
|                                      |           |       | GG (21)       | -0.90 $\pm$ 0.72                   |                        |             |
|                                      | Higher    | Young | AA+AG (20)    | 0.99 $\pm$ 0.63                    | -0.32, 0.46            | 0.10        |
|                                      |           |       | GG (31)       | 0.92 $\pm$ 0.79                    |                        |             |
|                                      |           | Older | AA+AG (28)    | <b>-0.82 <math>\pm</math> 0.57</b> | <b>-1.23, -0.48***</b> | <b>1.54</b> |
|                                      |           |       | GG (27)       | <b>0.03 <math>\pm</math> 0.53</b>  |                        |             |

Significant results in bold. \*:  $p \leq 0.05$ ; \*\*:  $p \leq 0.01$ ; \*\*\*:  $p \leq 0.001$ . CI: confidence interval; d: effect size - Cohen's d. SNP: single nucleotide polymorphism.

**Supplementary Table S2.** Significant CANTAB results in three-way ANOVA with Bootstrapping. Values are shown as mean Z score  $\pm$  SD.

| Tests                                       | Education     | Age          | SNP NTRK2<br>(rs2289656) | Mean $\pm$ SD                      | CI 95%                 | d           |
|---------------------------------------------|---------------|--------------|--------------------------|------------------------------------|------------------------|-------------|
| <b>With Bootstrapping 5000 samples</b>      |               |              |                          |                                    |                        |             |
| <b>PAL total errors adjusted (score)</b>    | <b>Lower</b>  | Young        | AA+AG                    | -0.73 $\pm$ 0.40                   | -0.49, 0.29            | 0.32        |
|                                             |               |              | GG                       | -0.83 $\pm$ 0.22                   |                        |             |
|                                             |               | Older        | AA+AG                    | 1.01 $\pm$ 1.14                    | -0.90, 0.44            | 0.23        |
|                                             |               |              | GG                       | 1.24 $\pm$ 0.92                    |                        |             |
|                                             | <b>Higher</b> | Young        | AA+AG                    | -0.86 $\pm$ 0.27                   | -0.09, 0.14            | 0.05        |
|                                             |               |              | GG                       | -0.87 $\pm$ 0.18                   |                        |             |
|                                             |               | <b>Older</b> | <b>AA+AG</b>             | <b>0.86 <math>\pm</math> 0.97</b>  | <b>0.53, 1.37***</b>   | <b>1.19</b> |
|                                             |               |              | <b>GG</b>                | <b>-0.07 <math>\pm</math> 0.52</b> |                        |             |
| <b>PAL mean trials to success (score)</b>   | <b>Lower</b>  | Young        | AA+AG                    | -0.83 $\pm$ 0.32                   | -0.11, 0.21            | 0.16        |
|                                             |               |              | GG                       | -0.88 $\pm$ 0.29                   |                        |             |
|                                             |               | Older        | AA+AG                    | 0.87 $\pm$ 0.94                    | -1.11, 0.07            | 0.58        |
|                                             |               |              | GG                       | 1.38 $\pm$ 0.83                    |                        |             |
|                                             | <b>Higher</b> | Young        | AA+AG                    | -0.94 $\pm$ 0.40                   | -0.18, 0.20            | 0.03        |
|                                             |               |              | GG                       | -0.95 $\pm$ 0.22                   |                        |             |
|                                             |               | <b>Older</b> | <b>AA+AG</b>             | <b>0.83 <math>\pm</math> 0.77</b>  | <b>0.38, 1.15***</b>   | <b>1.07</b> |
|                                             |               |              | <b>GG</b>                | <b>0.06 <math>\pm</math> 0.67</b>  |                        |             |
| <b>PAL first trial memory score (score)</b> | <b>Lower</b>  | Young        | AA+AG                    | 0.74 $\pm$ 0.72                    | -0.47, 0.30            | 0.12        |
|                                             |               |              | GG                       | 0.83 $\pm$ 0.77                    |                        |             |
|                                             |               | Older        | AA+AG                    | -1.02 $\pm$ 0.80                   | -0.60, 0.39            | 0.16        |
|                                             |               |              | GG                       | -0.90 $\pm$ 0.72                   |                        |             |
|                                             | <b>Higher</b> | Young        | AA+AG                    | 0.99 $\pm$ 0.63                    | -0.31, 0.45            | 0.10        |
|                                             |               |              | GG                       | 0.92 $\pm$ 0.79                    |                        |             |
|                                             |               | <b>Older</b> | <b>AA+AG</b>             | <b>-0.82 <math>\pm</math> 0.57</b> | <b>-1.13, -0.59***</b> | <b>1.54</b> |
|                                             |               |              | <b>GG</b>                | <b>0.03 <math>\pm</math> 0.53</b>  |                        |             |

Significant results in bold. \*:  $p \leq 0.05$ ; \*\*:  $p \leq 0.01$ ; \*\*\*:  $p \leq 0.001$ . CI: confidence interval; d: effect size - Cohen's d. SNP: single nucleotide polymorphism.
